# Supplementary material for: Maintenance therapy for acute lymphoblastic leukemia: basic science and clinical translations
Source: PubMed Central journal article supplement (PMC9252897; doi:10.1038/s41375-022-01591-4), 2022-06-02
Supplement: 41375_2022_1591_MOESM1_ESM.pdf [file 41375_2022_1591_MOESM1_ESM.pdf]

**Supplementary Table 1.** Differences in maintenance therapy (MT) between current protocols.

| Consortium               | Protocol            | 6-MP starting dose<br><i>TPMT</i> and <i>NUDT15</i> wildtype (mg/m <sup>2</sup> /day) (oral) | 6-MP starting dose<br>Heterozygous for <i>TPMT</i> and/or <i>NUDT15</i> low activity alleles (mg/m <sup>2</sup> /day) (oral) | 6-MP starting dose<br>Homozygous for <i>TPMT</i> and/or <i>NUDT15</i> low activity alleles (mg/m <sup>2</sup> /day) (oral) | MTX starting dose (mg/m <sup>2</sup> /week) (oral or intravenous) | Target ANC or WBC (x10 <sup>9</sup> /L) | Total ALL treatment duration              | Pulses during MT                                                                                                                      | CNS prophylaxis during MT (CNS1 only)                                                                                                |
|--------------------------|---------------------|----------------------------------------------------------------------------------------------|------------------------------------------------------------------------------------------------------------------------------|----------------------------------------------------------------------------------------------------------------------------|-------------------------------------------------------------------|-----------------------------------------|-------------------------------------------|---------------------------------------------------------------------------------------------------------------------------------------|--------------------------------------------------------------------------------------------------------------------------------------|
| ALLIC <sup>a</sup>       | ALLIC 2009          | 50                                                                                           | 50, <i>TPMT</i> and <i>NUDT15</i> genetics not investigated on a regular basis                                               | <i>TPMT</i> and <i>NUDT15</i> genetics not investigated on a regular basis                                                 | 20 oral                                                           | WBC: 2.0–3.0<br>ANC: ≥0.2               | 104 weeks from start of induction         | None                                                                                                                                  | SR/IR B-ALL: IT MTX x 4<br>T-ALL and PPR: IT MTX x 6                                                                                 |
| AIEOP-BFM <sup>a</sup>   | AIEOP-BFM ALL 2017  | 50                                                                                           | 50                                                                                                                           | 5                                                                                                                          | 20 oral                                                           | WBC: 1.5–3.0                            | 2 years from initial diagnosis            | None                                                                                                                                  | IT MTX/6 weeks x 6 in HR and patients with T-ALL                                                                                     |
| ALLTogether <sup>a</sup> | ALLTogether1        | 75                                                                                           | 75                                                                                                                           | 5                                                                                                                          | 20 oral                                                           | ANC: 0.75–1.5                           | 2 years from start of consolidation 1     | SR: none<br>IR-low: randomization to omit VCR/dexa pulses/4 weeks<br>IR-high: VCR/dexa pulses/4 weeks throughout MT<br>HR: HD-MTX x 3 | SR: IT MTX/12 weeks x 3<br>IR-low: IT MTX/12 weeks x 3<br>IR-high: IT MTX/12 weeks x 6<br>HR: IT MTX/6 weeks in MT1, /8 weeks in MT2 |
| COG[1]                   | AALL0331 (SR B-ALL) | 75                                                                                           | 30%–50% reduction                                                                                                            | 10–20 mg/m <sup>2</sup> /3 days a week                                                                                     | 20 oral                                                           | ANC: 0.5–1.5                            | 2/3 years from start of IM1 in girls/boys | VCR/dexa pulses/4 weeks                                                                                                               | IT MTX/12 weeks                                                                                                                      |

|                                     |                        |         |                      |                                              |                   |                  |                                                                              |                                                                                                                         |                                                                                                           |
|-------------------------------------|------------------------|---------|----------------------|----------------------------------------------|-------------------|------------------|------------------------------------------------------------------------------|-------------------------------------------------------------------------------------------------------------------------|-----------------------------------------------------------------------------------------------------------|
| COG[2]                              | AALL0232<br>(HR B-ALL) | 75      | 30%–50%<br>reduction | 10–20<br>mg/m <sup>2</sup> /3<br>days a week | 20 oral           | ANC:<br>0.5–1.5  | 2/3 years<br>from start of<br>IM1 in<br>girls/boys                           | VCR/prednisone<br>pulses/4 weeks                                                                                        | IT MTX x 1<br>or /12<br>weeks x 5<br>for patients<br>who did/did<br>not receive<br>cranial<br>irradiation |
| COG[3]                              | AALL0434<br>(T-ALL)    | 75      | 30%–50%<br>reduction | 10–20<br>mg/m <sup>2</sup> /3<br>days a week | 20 oral           | ANC:<br>0.5–1.5  | 2/3 years<br>from start of<br>IM1 in<br>girls/boys                           | VCR/prednisone<br>pulses/4 weeks<br>Randomized<br>study: addition of<br>3 cycles of<br>nelarabine for<br>IR/HR patients | LR: IT MTX<br>x 1 non-LR:<br>IT MTX/12<br>weeks x 5                                                       |
| DFCI <sup>a</sup>                   | DFCI 16-001            | 50      | 50                   | N/A<br>(adjusted<br>based on<br>tolerance)   | 30<br>intravenous | APC:<br>0.5–0.75 | 2 years from<br>date of<br>complete<br>remission<br>(end of<br>Induction IA) | VCR/dexa<br>pulses/3 weeks                                                                                              | B-ALL: TIT/<br>9 weeks x<br>6, then /18<br>weeks<br>T-ALL: TIT/<br>9 weeks                                |
| JCCG<br>(JPLSG) <sup>a</sup>        | JPLSG ALL<br>B19       | 50 oral | 50 oral              | 10 oral                                      | 20 oral           | WBC:<br>2–3      | Randomized<br>18–30<br>months from<br>initial<br>diagnosis <sup>b</sup>      | LR:<br>VCR/prednisolone<br>pulses/4 weeks                                                                               | LR: TIT/8<br>weeks x 5<br>SR: TIT/8<br>weeks x 2<br>IR: TIT/8<br>weeks x 4<br>HR: TIT/8<br>weeks x 6      |
| Malaysia-<br>Singapore <sup>a</sup> | Ma-Spore<br>ALL 2020   | 50      | 37.5                 | 5                                            | 20 oral           | ANC:<br>1–2      | 15–18<br>months                                                              | SR/IR: VCR/dexa<br>pulses/12 weeks<br>HR: VCR/dexa<br>pulses/4 weeks                                                    | IT MTX/ 12<br>weeks in<br>the first<br>year                                                               |
| SJCRH <sup>a</sup>                  | Total Therapy<br>17    | 75      | 50–60                | 10                                           | 40<br>intravenous | WBC:<br>1.8–3.0  | 2.5 years<br>from initial<br>diagnosis                                       | LR: VCR/dexa<br>pulses/4 weeks<br>for 1 year<br>SR: VCR/dexa<br>pulses/4 weeks<br>for 1–2 years                         | LR: TIT x 7<br>in the first<br>year<br>SR: TIT x<br>10 in the<br>first year                               |

<sup>a</sup> Personal communication from Principal Investigators

<sup>b</sup> Females with HHD B-ALL randomized 24 months vs. 30 months. Females with other subtypes randomized 18 months vs. 24 months. Males with ETV6-RUNX1/TCF3-PBX1 randomized 18 months vs. 24 months. Males with other subtypes randomized 24 months vs. 30 months.

1. Maloney KW, Devidas M, Wang C, Mattano LA, Friedmann AM, Buckley P, et al. Outcome in Children With Standard-Risk B-Cell Acute Lymphoblastic Leukemia: Results of Children's Oncology Group Trial AALL0331. *J Clin Oncol.* 2020;38(6):602.
2. Larsen EC, Devidas M, Chen S, Salzer WL, Raetz EA, Loh ML, et al. Dexamethasone and High-Dose Methotrexate Improve Outcome for Children and Young Adults With High-Risk B-Acute Lymphoblastic Leukemia: A Report From Children's Oncology Group Study AALL0232. *J Clin Oncol.* 2016;34(20):2380–8.
3. Winter SS, Dunsmore KP, Devidas M, Wood BL, Esiashvili N, Chen Z, et al. Improved Survival for Children and Young Adults With T-Lineage Acute Lymphoblastic Leukemia: Results From the Children's Oncology Group AALL0434 Methotrexate Randomization. *J Clin Oncol.* 2018;36(29):2926–34.

6-MP, 6-mercaptopurine; AIEOP, Associazione Italiana di Ematologia e Oncologia Pediatrica; ALL, acute lymphoblastic leukemia; ALLIC; Acute lymphoblastic leukemia inter-continental; ANC, absolute neutrophil count; APC; absolute polymorph count; B-ALL; B-cell acute lymphoblastic leukemia; BFM: Berlin-Frankfurt-Münster; COG, Children's Oncology Group; DFCI, Dana-Farber Cancer Institute Consortium; dexamethasone; EORTC, European Organization for Research and Treatment of Cancer; HHD, high hyperdiploid; HR, high risk; IM, interim maintenance; IR, intermediate risk; IT, intrathecal; JCCG, Japan Children's Cancer Group; JPLSG; Japan Pediatric Leukemia/Lymphoma Study Group; LR, low-risk; MT, maintenance therapy; MTX, methotrexate; NUDT15, nudix hydrolase 15; PPR, prednisolone poor response; SJCRH, St Jude Children's Research Hospital; T-ALL; T-cell acute lymphoblastic leukemia; TIT, intrathecal methotrexate/cytarabine/hydrocortisone; TPMT, thiopurine S-methyltransferase; SR, standard risk; VCR, vincristine; WBC, white blood cell count.
